# Supplementary material for: Matrix Metallopeptidase 14: A Candidate Prognostic Biomarker for Diffuse Large B-Cell Lymphoma
Source: Front Oncol. 2020 Aug 20;10:1520. doi: 10.3389/fonc.2020.01520 (PMC7473157; doi:10.3389/fonc.2020.01520)
Supplement: Supplementary file 1 [file Table_1.xls]

## Sheet: Sheet1
	TABLE S1 | 29 overlapped genes in two independent DLBCL Gene Expression Omnibus (GEO) cohorts (GSE10846, 420 samples; GSE98588,137 samples)
	Genes
1	METTL26
2	HMGCS2
3	DSC2
4	TMEM2
5	ITGAV
6	SUOX
7	GRB7
8	ABHD1
9	SH3GLB2
10	LRMDA
11	SLC2A13
12	CAST
13	TSEN2
14	MMP14
15	WDR90
16	AKR7A3
17	AIMP1
18	SLFN5
19	RIMS2
20	ZNF792
21	TEAD1
22	LINC00477
23	RAB40C
24	LTB
25	MELTF-AS1
26	DPP10-AS3
27	LINC00960
28	LINC01959
29	FAM215A
